# Supplementary material for: Gold Glyconanoparticles Combined with 91–99 Peptide of the Bacterial Toxin, Listeriolysin O, Are Efficient Immunotherapies in Experimental Bladder Tumors
Source: MDPI journal article supplement (doi:10.3390/cancers14102413), 2022-05-13
Supplement: s1 [file s1]

# Gold glyconanoparticles combined to 91-99 peptide of the bacterial toxin, listeriolysin O, are efficient immunotherapies in experimental bladder tumor

**Table S1.** Cytokine pattern in sera of patients with different solid tumors.

| Patients code <sup>a</sup> | Clinical clasifica-<br>tion     | Treatments                    | IL-17A <sup>b,*</sup> | IFN-      | IL-2        | IL-6       | IL-10      | TNF-        |
|----------------------------|---------------------------------|-------------------------------|-----------------------|-----------|-------------|------------|------------|-------------|
| MEL-1                      | Metastatic mela-<br>noma (IV)   | NT                            | 84.7 ± 0.1            | 3.1 ± 0.1 | 15.58 ± 0.4 | 33.4 ± 0.9 | 23.6 ± 0.9 | 45.25 ± 0.1 |
| MEL-2                      | Nodular melanoma<br>(III B)     | Tumor surgery                 | 105 ± 0.5             | 2.5± 0.1  | 11.47 ± 0.3 | 19.1 ±0.1  | 19.6± 0.1  | 13.78± 0.1  |
| MEL-3                      | Metastatic mela-<br>noma (IV)   | NT                            | 89.5 ± 0.5            | 2.3 ± 0.1 | 19.65 ± 0.2 | 19.3 ± 0.2 | 13.3 ± 9.2 | 13.25 ± 0.1 |
| BC-1                       | Lung and bladder<br>carcinoma   | Cisplastin-ec-<br>toposide    | 16.32± 0.1            | 1.4± 0.1  | 2.22 ± 0.2  | 6.0± 0.1   | 4.6± 0.1   | 7.8 ± 0.1   |
| BC-2                       | Urothelial bladder<br>carcinoma | NT                            | 2.21 ± 1.2            | 0.9 ± 0.1 | 0.8 ± 0.1   | 12.1 ± 0.4 | 2.35 ± 0.3 | 17.61± 0.2  |
| BC-3                       | Urothelial bladder<br>carcinoma | NT                            | 6.4 ± 0.2             | 1.9 ± 0.1 | 1.29± 0.1   | 6.07 ± 0.2 | 8.14 ± 0.2 | 18.3 ± 0.1  |
| HEP-1                      | Hepatocellular car-<br>cinoma   | Ablation by mi-<br>crowaves   | 18.5± 0.1             | 2.1± 0.1  | 3.36 ± 0-3  | 19± 0.9    | 6.4± 0.1   | 3.84± 0.1   |
| PROST-1                    | Prostate adenocar-<br>cinoma    | Taxocel                       | 11.5 ± 0.1            | 4.4± 0.2  | 4.14 ± 0.3  | 6.6± 0.2   | 4.1± 0.2   | 6.8 ± 0.1   |
| GLIO-1                     | Multiform glioblas-<br>toma     | Temozolamide-<br>radiotherapy | 12.2 ± 0.3            | 1.4 ± 0.2 | 4.93 ± 0.2  | 8.8±0.8    | 3.88 ± 0.2 | 12.2 ± 0.2  |
| CONT-1                     | NONE                            | NT                            | 2.8 ± 0.1             | 2.4± 0.1  | 3.0 ± 0.2   | 3.1± 0.1   | 2.4± 0.1   | 2.0± 0.1    |
| CONT-2                     | NONE                            | NT                            | 3.5 ± 0.1             | 2.3± 0.1  | 3.15 ± 0.2  | 3± 0.1     | 2.3± 0.1   | 2.1± 0.1    |

<sup>a</sup> Clinical manifestations and treatments of patients with informed consent selected for the study. CONT, healthy donors. <sup>b</sup> Cytokines are measured in sera of patients (Luminex kits, EMD Millipore Corporation, Billerica MA). Results are the mean of cytokine concentrations (pg/mL) ± SD. (\*  $p < 0.05$ ).

**A**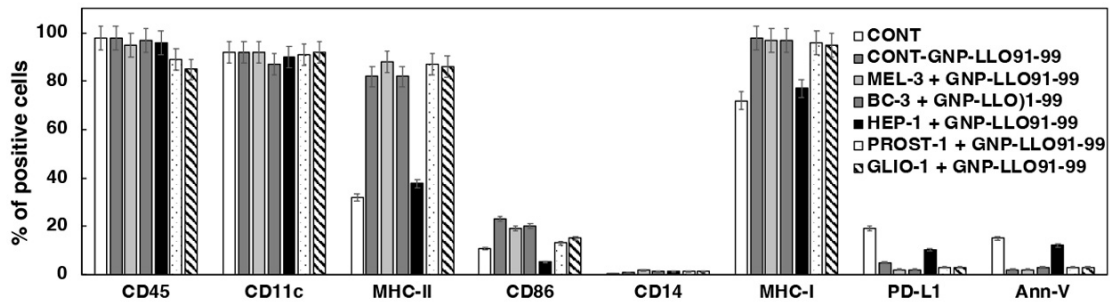**B**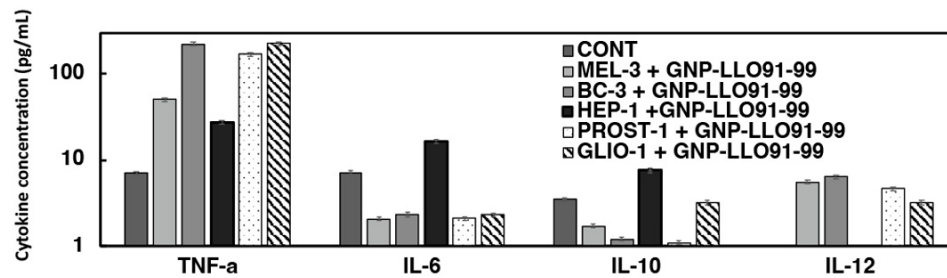

**Figure S1.** GNP-LLO<sub>91-99</sub> nanovaccines effect as adjuvants in MoDC from human donors. **(a)** MoDC from healthy donors (CONT), melanoma (MEL-3), urothelial bladder cancer (BC-3), hepatocellular carcinoma (HEP-1), prostate adenocarcinoma (PROST-1) and multiforme glioblastoma (GLIO-1) patients were incubated with GNP-LLO<sub>91-99</sub> (50 µg/mL) for 16 hours. MoDC were analysed for DC (CD45, CD11c), monocyte (CD14), antigen-presentation (MHC-I, MHC-II, CD86) and cell-death (PD-L1 or Annexin-V) surface markers by FACS using specific monoclonal antibodies. Results are expressed as the mean percentages of positive cells  $\pm$  SD ( $P \leq 0.5$ ). **(b)** Supernatants of same MoDC as in **(a)** after GNP-LLO<sub>91-99</sub> treatment were collected and cytokine concentration analysed (Luminex kits, EMD Millipore Corporation, Billerica MA). Results are the mean of cytokine concentrations (pg/mL)  $\pm$  SD. (\* $P < 0.5$ ).

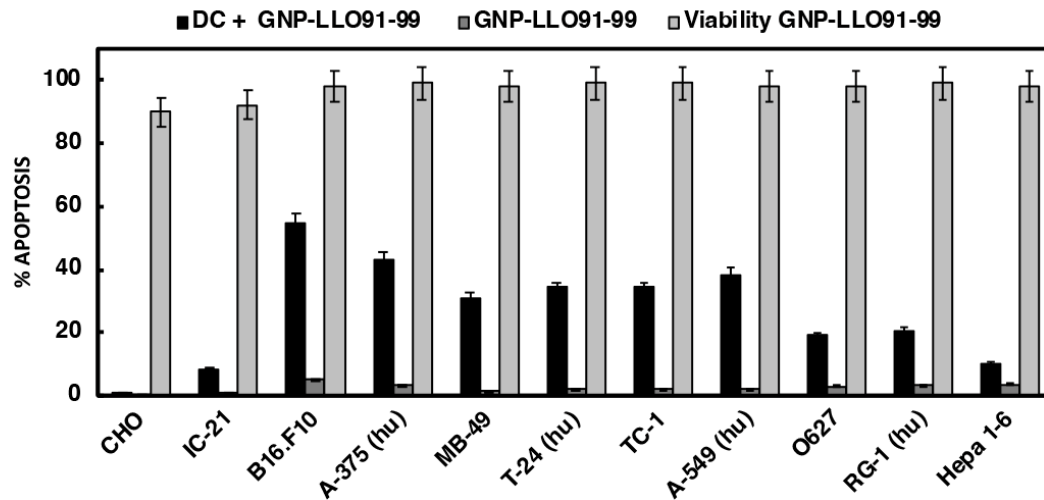

**Figure S2.** GNP-LLO<sub>91-99</sub> nanovaccines effect onto cell toxicity, direct apoptosis, and immunogenic apoptosis of solid tumors. Hamster CHO ovary tumor, murine IC-21 macrophage-like tumor cells, murine B16.F10 and human A-375 melanoma, murine MB-49 and human T-24 bladder tumors, murine TC-1, and human A-549 NSCLC lung tumors, murine O627 and human RG-1 glioblastoma and murine Hepa 1-6 hepatocellular carcinoma were incubated 16 hours at 37°C with GNP-LLO<sub>91-99</sub> nanovaccines (50 µg/mL) and examined for viability tests using Trypan blue staining (light grey bars) or for direct apoptosis using flow cytometry (black bars). For immunogenic apoptosis, tumors are incubated with ½ supernatants of DC/MoDC pre-treated with GNP-LLO<sub>91-99</sub> nanovaccines (50 µg/mL for 16 hours at 37°C) (dark grey bars). Apoptosis was examined by FACS using the DNA marker, 7-AAD (7-AAD-PE) and the apoptotic marker, annexin V (annexin V-APC). Results for cell viability are expressed as the mean of unstained cells ± SD ( $P < 0.5$ ). Results for apoptosis are expressed as percentages of apoptotic cells ± SD ( $P \leq 0.5$ ). GNP-LLO<sub>91-99</sub> nanovaccines caused no cell toxicity or direct apoptosis into tumor cells, while they were able to induce immunogenic apoptosis of hot tumors as melanoma (B16.F10, A-375), lung NSCLC tumors (TC-1, A-549), bladder tumors (MB-49) or cold tumors as glioblastoma (O627, RG-1) but not in other cold tumors as ovary tumors (CHO), SV-40 induced macrophage-like tumor cells (IC-21) or hepatocellular carcinoma (Hepa 1-6).
